# Supplementary material
Source: Springer Nature journal article supplement (https://www.springermedizin.de/resource/supplementary/12967_2014_2113_MOESM17_ESM.pdf/9575066)

V-IPN Subnetworks

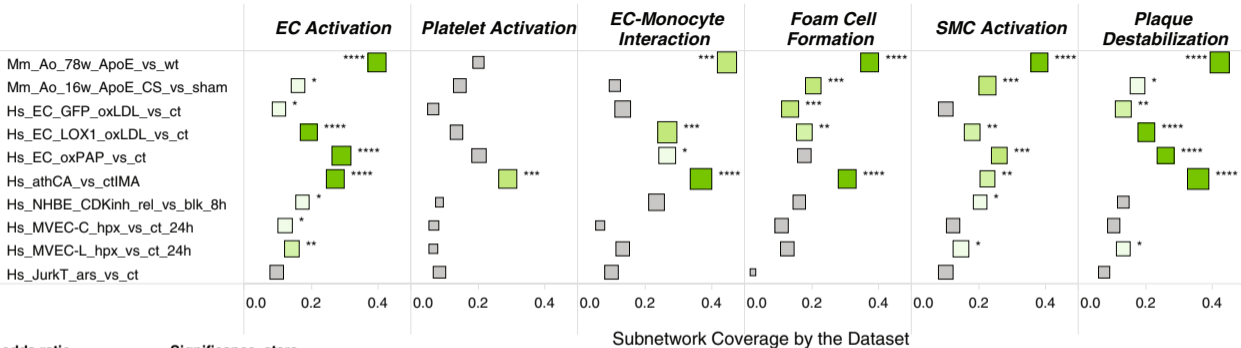

Subnetwork Coverage by the Dataset

Supplement: MOESM17 [file 9575066]
